# Supplementary material for: Amineborane dehydrogenation promoted by isolable zirconium sandwich, titanium sandwich and N2 complexes
Source: Royal Society of Chemistry journal article supplement (doi:10.1039/b704941b), 2007-01-01
Supplement: b704941b.pdf [file b704941b.pdf]

**Amineborane Dehydrogenation Promoted by Isolable Zirconium  
Sandwich, Titanium Sandwich and N<sub>2</sub> Complexes.**

*Doris Pun, Emil Lobkovsky and Paul J. Chirik\**

*Department of Chemistry and Chemical Biology, Baker Laboratory, Cornell University  
Ithaca, New York, USA 14853*

*Supporting Information*

## Table of Contents

|                                        |     |
|----------------------------------------|-----|
| Experimental Procedures                | S3  |
| Representative Kinetics Run            | S8  |
| Representative $^{11}\text{B}$ Spectra | S9  |
| References                             | S10 |

## Experimental Procedures

**General Considerations.** All air- and moisture-sensitive manipulations were carried out using standard high vacuum line, Schlenk or cannula techniques or in an M. Braun inert atmosphere drybox containing an atmosphere of purified nitrogen. The M. Braun drybox was equipped with a cold well designed for freezing samples in liquid nitrogen. Solvents for air- and moisture-sensitive manipulations were dried and deoxygenated using literature procedures.<sup>1</sup> Toluene, benzene, pentane and heptane were further dried by distillation from “titanocene”.<sup>2</sup> Deuterated solvents for NMR spectroscopy were distilled from sodium metal under an atmosphere of argon and stored over 4 Å molecular sieves. Argon and hydrogen gas were purchased from Airgas Incorporated and passed through a column containing manganese oxide on vermiculite and 4 Å molecular sieves before admission to the high vacuum line. Me<sub>2</sub>NHBH<sub>3</sub> was purchased from Aldrich and sublimed at 30 °C before use. H<sub>3</sub>NBH<sub>3</sub> was prepared according to literature procedure<sup>3</sup> and recrystallized from THF/Et<sub>2</sub>O at low temperature prior to use.

<sup>1</sup>H and <sup>13</sup>C NMR spectra were recorded on a Varian Inova 400 Spectrometer operating at 399.799 MHz (<sup>1</sup>H) and on a Varian Inova 500 Spectrometer operating at 125.704 MHz (<sup>13</sup>C), respectively. <sup>11</sup>B NMR spectra were recorded on a Bruker ARX 300 MHz Spectrometer operating at 96.294 MHz (<sup>11</sup>B). In some cases, reactions catalytic reactions were monitored in THF solution by <sup>11</sup>B NMR spectroscopy. Chemical shifts are reported relative to SiMe<sub>4</sub> using <sup>1</sup>H (residual) or <sup>13</sup>C NMR chemical shifts of the solvent as secondary standard or external BF<sub>3</sub>·Et<sub>2</sub>O (<sup>11</sup>B). **1**,<sup>4</sup> **2**,<sup>5</sup> **3**,<sup>6</sup> **4**,<sup>7</sup> **6**,<sup>8</sup> **7**<sup>9</sup> **8**,<sup>10</sup> **9**<sup>10</sup>, **10**<sup>11</sup> and **11**<sup>11</sup> were all prepared according to literature procedures.

**General Procedure for Catalytic Dehydrogenation of Me<sub>2</sub>NHBH<sub>3</sub>.** A J. Young NMR tube was charged with 0.018 g (305 μmol) of Me<sub>2</sub>NHBH<sub>3</sub> and 0.003 g (6 μmol) of the desired catalyst. Approximately 0.5 mL of benzene-*d*<sub>6</sub> was added to the tube, sealed with a Teflon valve and heated to 65 °C in a temperature controlled oil bath if necessary. Conversion to [Me<sub>2</sub>NBH<sub>2</sub>]<sub>2</sub> was monitored as a function of time by <sup>11</sup>B NMR and <sup>1</sup>H NMR spectroscopy. <sup>11</sup>B NMR (benzene-*d*<sub>6</sub>): δ = 5.0 (t, J<sub>BH</sub> = 112 Hz, [Me<sub>2</sub>NBH<sub>2</sub>]<sub>2</sub>); δ = 1.5 (t, J<sub>BH</sub> = 113 Hz, [Me<sub>2</sub>NBH<sub>2</sub>]<sub>3</sub>), δ = 37.8 (t, J<sub>BH</sub> = 130 Hz, Me<sub>2</sub>N=BH<sub>2</sub>). A similar procedure was used for the dehydrogenation of NH<sub>3</sub>BH<sub>3</sub> with THF as the solvent.

**Quantification of H<sub>2</sub> Gas by Toepler Pump.** A J. Young NMR tube was charged with 0.011 g (187 μmol) of Me<sub>2</sub>NHBH<sub>3</sub> and 7 μmol of the desired catalyst. Approximately 0.5 mL of benzene was added either by vacuum transfer or via pipette. The catalytic reaction was stirred until it reached the known time for completion after which time all of the gases were collected by a Toepler pump and quantified. The gases were exposed to combustion conditions by heating to 75 °C under vacuum and the non-condensable gas recollected and the amount of hydrogen liberated determined by difference.

**Preparation of (η<sup>5</sup>-C<sub>9</sub>H<sub>5</sub>-1,3-<sup>i</sup>Pr<sub>2</sub>)(η<sup>5</sup>-C<sub>9</sub>H<sub>9</sub>-1,3-<sup>i</sup>Pr<sub>2</sub>)Zr(BH<sub>4</sub>)H (13).** A thick walled glass vessel was charged with 0.050 g of (0.102 mmol) of **9** and approximately 5 mL of toluene was added. To the burgundy solution, 0.301 g (5.10 mmol) of Me<sub>2</sub>NHBH<sub>3</sub> dissolved in approximately 15 mL of toluene was added, resulting in an immediate color change to yellow. The reaction mixture was stirred and heated to 65 °C for one week, after which time the dihydrogen byproduct, solvent, amineborane product and unreacted

starting material were removed *in vacuo*. Recrystallization from pentane at 35 °C yielded 0.082 g (79.0%) of a white solid identified as **13**. Anal. Calcd. for C<sub>30</sub>H<sub>47</sub>ZrB: C, 70.59; H, 9.22. Found: C, 70.59; H, 9.38. <sup>1</sup>H NMR (benzene-*d*<sub>6</sub>): δ = 0.03 (br, 4H, BH<sub>4</sub>), 1.02 (d, 8Hz, 3H, THI CHMe<sub>2</sub>), 1.06 (d, 4Hz, 3H, THI CHMe<sub>2</sub>), 1.13 (d, 7Hz, 3H, Ind CHMe<sub>2</sub>), 1.16 (d, 7Hz, 3H, Ind CHMe<sub>2</sub>), 1.21 (d, 7Hz, 3H, THI CHMe<sub>2</sub>), 1.24 (d, 8Hz, 3H, THI CHMe<sub>2</sub>), 1.37 (m, 1H, THI), 1.41 (m, 1H, THI), 1.51 (d, 7Hz, 3H, Ind CHMe<sub>2</sub>), 1.62 (d, 7Hz, 3H, Ind CHMe<sub>2</sub>), 1.92 (m, 2H, THI), 2.42 (m, 4H, 2 THI/2 THI CHMe<sub>2</sub>), 2.72 (s, 1H, Zr-H), 2.81 (m, 1H, THI), 3.02 (m, 1H, THI), 3.36 (m, 1H, Ind CHMe<sub>2</sub>), 3.85 (m, 1H, Ind CHMe<sub>2</sub>), 5.45 (s, 1H, CpH), 6.34 (s, 1H, CpH), 6.70 (m, 1H, benzo), 6.77 (m, 1H, benzo), 7.25 (m, 2H, benzo). <sup>11</sup>B NMR (benzene-*d*<sub>6</sub>): δ = 6.00 (br, Zr-BH<sub>4</sub>). <sup>13</sup>C NMR (benzene-*d*<sub>6</sub>): δ = 21.99, 22.22, 22.61, 23.17, 23.37, 24.09, 24.83, 25.49, 25.59, 25.73, 25.96, 25.97, 26.96, 27.41, 28.77, 29.74 (CHMe<sub>2</sub>/THI), 108.5, 112.07, 117.34, 117.97, 120.10, 122.04, 123.08, 123.35, 124.20, 124.61, 124.85, 124.94, 126.18, 131.48 (Cp/Benzo). IR (KBr): ν = 2106 (w), 1966 (m), 1634 (w), 1456 (m), 1376 (m), 1142 cm<sup>-1</sup> (w).

**Preparation of (η<sup>5</sup>-C<sub>9</sub>H<sub>9</sub>-1,3-<sup>i</sup>Pr<sub>2</sub>)<sub>2</sub>Zr(BH<sub>4</sub>)H (**14**).** This compound was prepared in a similar manner to **13** with 0.070 g of (0.140 mmol) of **11** and 0.160 g (2.71 mmol) of Me<sub>2</sub>NHBH<sub>3</sub> with heating at 70 °C for three weeks. <sup>1</sup>H NMR (benzene-*d*<sub>6</sub>): δ = -0.02 (br, 4H, BH<sub>4</sub>), 1.16 (d, 3H, THI CHMe<sub>2</sub>), 1.17 (d, 3H, THI CHMe<sub>2</sub>), 1.20 (d, 3H, THI CHMe<sub>2</sub>), 1.21 (d, 3H, THI CHMe<sub>2</sub>), 1.48 (m, 2H, THI), 1.65 (m, 2H, THI), 1.98 (m, 2H, THI), 2.10 (m, 2H, THI), 2.49 (m, 2H, THI), 2.60 (m, 2H, THI), 2.80 (m, 2H, THI CHMe<sub>2</sub>), 2.98 (m, 2H, THI), 3.02 (m, 2H, THI CHMe<sub>2</sub>), 5.16 (s, 2H, CpH), 5.44 (s, 1H,

ZrH).  $^{11}\text{B}$  NMR (benzene- $d_6$ ):  $\delta = 7.90$  (br, Zr-BH $_4$ ).  $^{13}\text{C}$  NMR (benzene- $d_6$ ):  $\delta = 23.33$ , 23.35, 24.08, 24.12, 24.38, 24.54, 25.89, 28.55, 28.77 (CHMe $_2$ /THI), 98.35, 123.29, 123.45 (Cp). One CHMe $_2$ /THI and two Cp resonances not located. IR (KBr):  $\nu = 1965$  (m), 1624 (w), 1450 (m), 1362 (m), 1143  $\text{cm}^{-1}$  (w).

**Preparation of  $(\eta^5\text{-C}_5\text{Me}_4\text{H})_2\text{Zr}(\text{BH}_4)\text{H}$  (12).** Prepared in a similar manner as **13** using 0.003 g of (.009 mmol) of **7** and 0.026 g (1.53 mmol) of Me $_2\text{NHBH}_3$ , heating at 65 °C for one week.  $^1\text{H}$  NMR (benzene- $d_6$ ):  $\delta = -0.03$  (br, 4H, BH $_4$ ), 1.85 (s, 6H, CpMe), 1.93 (s, 6H, CpMe), 2.02 (s, 6H, CpMe), 2.07 (s, 6H, CpMe), 4.89 (s, 2H, CpH), 5.34 (s, 1H, Zr-H).  $^{11}\text{B}$  NMR (benzene- $d_6$ ):  $\delta = 3.11$  (br, Zr-BH $_4$ ).  $^{13}\text{C}$  NMR (benzene- $d_6$ ):  $\delta = 12.55$ , 12.69, 13.39, 14.77 (CpMe), 107.07, 114.38, 116.91, 121.85, 122.51 (Cp). IR (KBr):  $\nu = 2453$  (m), 2413 (m), 2087 (w), 1973 (w), 1578 (w), 1453 (w), 1366 (m), 1138 (m), 1026  $\text{cm}^{-1}$  (w), 841 (m).

**Preparation of  $(\eta^5\text{-C}_5\text{H}_3\text{-1-Me-3-}^i\text{Pr})_2\text{TiCl}$ .** A 250 mL round bottomed flask was charged with 1.495 g (11.67 mmol) of Li[C $_5\text{H}_3\text{-1-Me-3-}^i\text{Pr}$ ] and 2.14 g (5.84 mmol) of TiCl $_3(\text{THF})_3$ . Approximately 100 mL of THF was added by vacuum transfer. The solution was heated to reflux overnight after which the solvent was removed *in vacuo*. The resulting solid was dissolved in pentane and filtered through Celite. Removal of the pentane *in vacuo* yielded a brown solid, which was recrystallized from pentane at -35 °C. Anal. Calcd. for C $_{18}\text{H}_{26}\text{TiCl}$ : C, 66.37; H, 8.05. Found: C, 65.97; H, 8.22.

**Preparation of  $[(\eta^5\text{-C}_5\text{H}_3\text{-1-Me,3-}^i\text{Pr})_2\text{Ti}]_2(\mu_2, \eta^2, \eta^2\text{-N}_2)$  (**5**).** A 100 mL round bottom flask was charged with 28.10 g of mercury and approximately 5 mL of toluene was added. To the stirring solution, 0.141 g (6.13 mmol) of sodium was added and the mixture was stirred for 20 minutes. 0.387 g (1.19 mmol) of  $(\eta^5\text{-C}_5\text{H}_3\text{-1-Me,3-}^i\text{Pr})_2\text{TiCl}$  dissolved in 20 mL of toluene was added and the reaction was stirred vigorously for three days. Filtration of the blue solution through Celite followed by solvent removal *in vacuo* produced a blue oil. Recrystallization from pentane at  $-35\text{ }^\circ\text{C}$  yielded 0.10 g (13.8 %) of a blue solid identified as **5**. Anal. Calcd. for  $\text{C}_{36}\text{H}_{52}\text{Ti}_2\text{N}_2$ : C, 71.05; H, 8.61; N, 4.60. Found: C, 70.85; H, 9.06; N, 4.34.

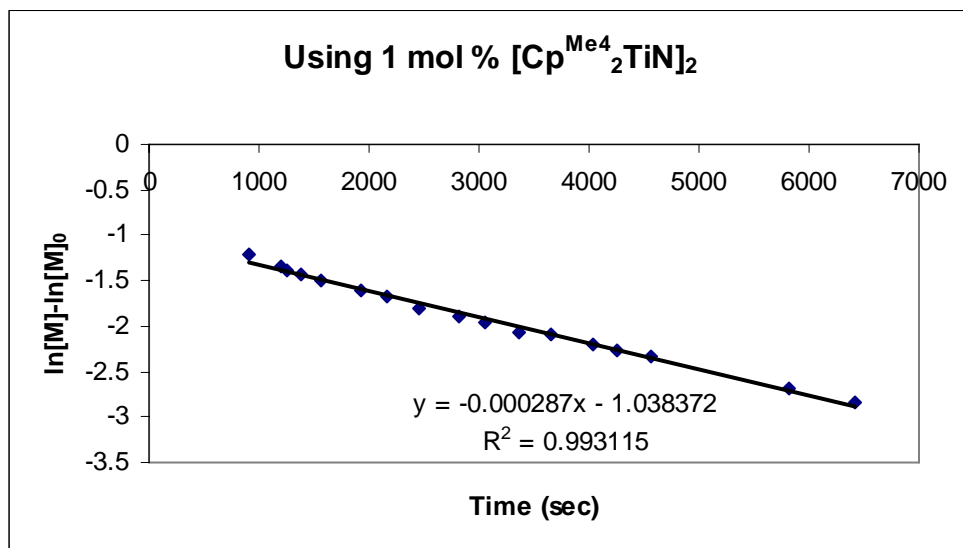

**Figure S1:** Plot of  $\ln(\text{Me}_2\text{NHBH}_3)$  vs time (sec) for catalytic dehydrogenation of  $\text{Me}_2\text{NHBH}_3$  at 22 °C using 2 mol % cat. loading.

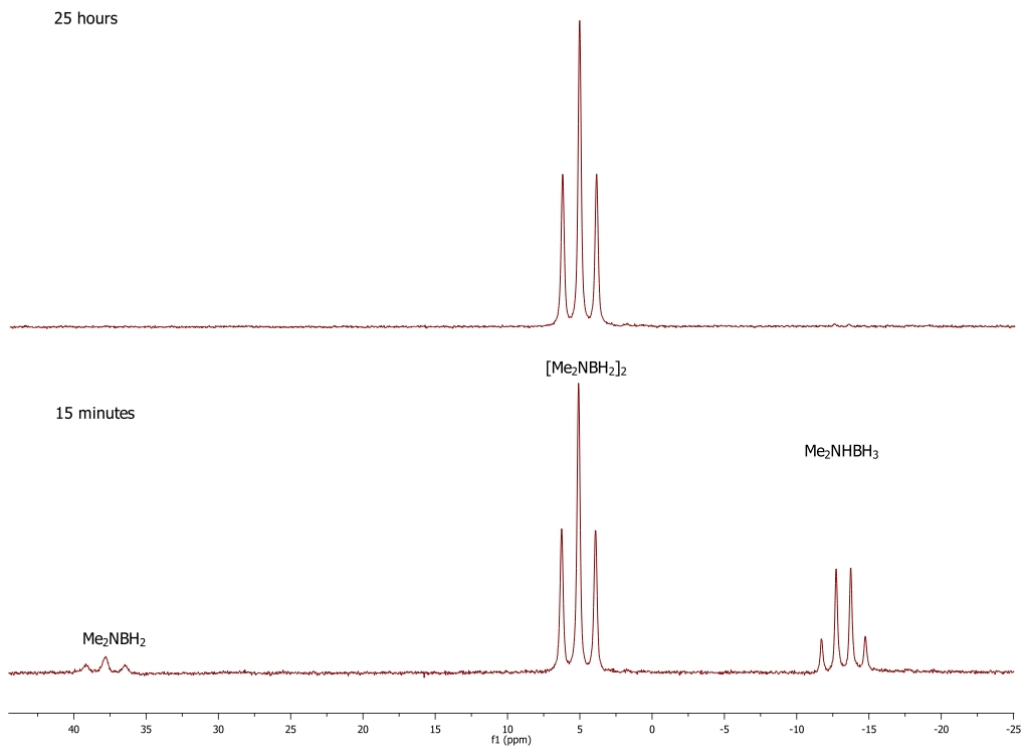

**Figure S2:**  $^1\text{H}$ -coupled  $^{11}\text{B}$  NMR spectra of 1 mol % **3** and  $\text{Me}_2\text{NHBH}_3$  in  $\text{C}_6\text{D}_6$  at  $23\text{ }^\circ\text{C}$  with time.

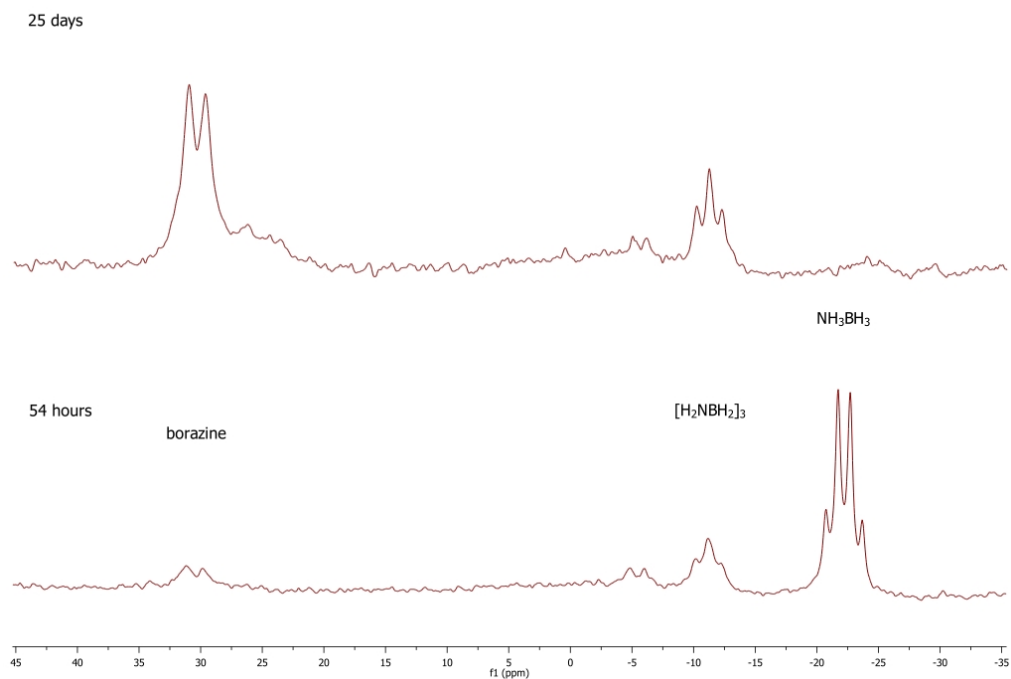

**Figure S3.**  $^1\text{H}$ -coupled  $^{11}\text{B}$  NMR spectra of 1 mol % **4** and  $\text{NH}_3\text{BH}_3$  in THF at  $65\text{ }^\circ\text{C}$  with time. Initially there is some undissolved  $\text{NH}_3\text{BH}_3$  but upon conversion, all products and starting materials are dissolved.

## References

- <sup>1</sup> Pangborn, A.B.; Giardello, M.A.; Grubbs, R.H.; Rosen, R.K.; Timmers, F.J. *Organometallics* **1996**, *15*, 1518.
- <sup>2</sup> Marvich, R.H.; Brintzinger, H.H. *J. Am. Chem. Soc.* **1971**, *93*, 2046.
- <sup>3</sup> Keaton, R. J.; Blacquiere, J. M.; Baker, R. T. *J. Am. Chem. Soc.* **2006**, *127*, 1844.
- <sup>4</sup> Hanna, T. E.; Lobkovsky, E.; Chirik, P. J. *J. Am. Chem. Soc.* **2004**, *126*, 14688.
- <sup>5</sup> (a) Lukesová, L.; Horáček, M.; Stepnicka, P.; Fejfarová, K.; Gyepes, R.; Cisarová, I.; Kubista, J.; Mach, K. *J. Organomet. Chem.* **2002**, *663*, 134. (b) Horáček, M.; Kupfer, V.; Thewalt, U.; Stepnicka, P.; Polasek, M.; Mach, K. *Organometallics* **1999**, *18*, 3572.
- <sup>6</sup> de Wolf, J. M.; Blaauw, R.; Meetsma, A.; Teuben J. H.; Gyepes, R.; Varga, V.; Mach, K.; Veldman, N.; Spek, A. L. *Organometallics* **1996**, *15*, 4977.
- <sup>7</sup> Hanna, T. E.; Keresztes, I.; Bernskoetter, W. H.; Lobkovsky, E.; Chirik, P. J. *Organometallics* **2004**, *23*, 3448.
- <sup>8</sup> Hanna, T. E.; Bernskoetter, W. H.; Bouwkamp, M. W.; Lobkovsky, E.; Chirik, P. J. *Organometallics* **2007**, ASAP.
- <sup>9</sup> Chirik, P. J.; Day, M. W.; Bercaw, J. E. *Organometallics* **1999**, *18*, 1873.
- <sup>10</sup> Bradley, C.A.; Keresztes, I., Lobkovsky, E.; Young, V. G.; Chirik, P. J. *J. Am. Chem. Soc.* **2004**, *126*, 16937.
- <sup>11</sup> Bradley, C. A.; Lobkovsky, E.; Keresztes, I.; Chirik, P. J. *J. Am. Chem. Soc.* **2006**, *128*, 6464.
